# Supplementary material
Source: MDPI journal article supplement (https://www.mdpi.com/2624-8549/3/1/15)

# checkCIF/PLATON report

Structure factors have been supplied for datablock(s) rod146\_150k\_0m

THIS REPORT IS FOR GUIDANCE ONLY. IF USED AS PART OF A REVIEW PROCEDURE FOR PUBLICATION, IT SHOULD NOT REPLACE THE EXPERTISE OF AN EXPERIENCED CRYSTALLOGRAPHIC REFEREE.

No syntax errors found.      CIF dictionary      Interpreting this report

## Datablock: rod146\_150k\_0m

---

Bond precision:    C-C = 0.0046 A

Wavelength=1.54178

Cell:                    a=7.9898(5)                    b=9.3656(5)                    c=23.6072(13)  
                          alpha=98.626(2)                    beta=96.301(2)                    gamma=97.555(2)  
Temperature:    150 K

|                | Calculated           | Reported               |
|----------------|----------------------|------------------------|
| Volume         | 1716.19(17)          | 1716.19(17)            |
| Space group    | P -1                 | P -1                   |
| Hall group     | -P 1                 | -P 1                   |
| Moiety formula | C35 H30 Br Cu2 N3 O8 | C70 H60 Br2 Cu4 N6 O16 |
| Sum formula    | C35 H30 Br Cu2 N3 O8 | C70 H60 Br2 Cu4 N6 O16 |
| Mr             | 827.62               | 1655.22                |
| Dx,g cm-3      | 1.602                | 1.602                  |
| Z              | 2                    | 1                      |
| Mu (mm-1)      | 3.363                | 3.363                  |
| F000           | 836.0                | 836.0                  |
| F000'          | 828.88               |                        |
| h,k,lmax       | 9,11,28              | 9,11,28                |
| Nref           | 6534                 | 6338                   |
| Tmin,Tmax      | 0.508,0.714          | 0.611,0.753            |
| Tmin'          | 0.454                |                        |

Correction method= # Reported T Limits: Tmin=0.611 Tmax=0.753  
AbsCorr = MULTI-SCAN

Data completeness= 0.970

Theta(max)= 70.224

R(reflections)= 0.0482( 6120)

wR2(reflections)= 0.1328( 6338)

S = 1.072

Npar= 446

---

The following ALERTS were generated. Each ALERT has the format

**test-name\_ALERT\_alert-type\_alert-level.**

Click on the hyperlinks for more details of the test.



---

**🟡 Alert level B**

PLAT971\_ALERT\_2\_B Check Calcd Resid. Dens. 1.01A From Br1 2.96 eA-3

---

**🟢 Alert level C**

DIFMX02\_ALERT\_1\_C The maximum difference density is > 0.1\*ZMAX\*0.75  
The relevant atom site should be identified.

|                                                                    |             |
|--------------------------------------------------------------------|-------------|
| PLAT094_ALERT_2_C Ratio of Maximum / Minimum Residual Density .... | 2.50 Report |
| PLAT097_ALERT_2_C Large Reported Max. (Positive) Residual Density  | 2.78 eA-3   |
| PLAT911_ALERT_3_C Missing FCF Refl Between Thmin & STh/L= 0.600    | 63 Report   |

---

**🟣 Alert level G**

|                                                                    |              |
|--------------------------------------------------------------------|--------------|
| PLAT004_ALERT_5_G Polymeric Structure Found with Maximum Dimension | 1 Info       |
| PLAT042_ALERT_1_G Calc. and Reported MoietyFormula Strings Differ  | Please Check |
| PLAT045_ALERT_1_G Calculated and Reported Z Differ by a Factor ... | 2.00 Check   |
| PLAT154_ALERT_1_G The s.u.'s on the Cell Angles are Equal ..(Note) | 0.002 Degree |
| PLAT794_ALERT_5_G Tentative Bond Valency for Cu1 (II) .            | 2.12 Info    |
| PLAT794_ALERT_5_G Tentative Bond Valency for Cu2 (II) .            | 2.13 Info    |
| PLAT910_ALERT_3_G Missing # of FCF Reflection(s) Below Theta(Min). | 1 Note       |
| PLAT912_ALERT_4_G Missing # of FCF Reflections Above STh/L= 0.600  | 132 Note     |
| PLAT933_ALERT_2_G Number of OMIT Records in Embedded .res File ... | 3 Note       |
| PLAT941_ALERT_3_G Average HKL Measurement Multiplicity .....       | 4.4 Low      |
| PLAT978_ALERT_2_G Number C-C Bonds with Positive Residual Density. | 8 Info       |
| PLAT992_ALERT_5_G Repd & Actual _reflns_number_gt Values Differ by | 4 Check      |

---

0 **ALERT level A** = Most likely a serious problem - resolve or explain  
1 **ALERT level B** = A potentially serious problem, consider carefully  
4 **ALERT level C** = Check. Ensure it is not caused by an omission or oversight  
12 **ALERT level G** = General information/check it is not something unexpected

4 ALERT type 1 CIF construction/syntax error, inconsistent or missing data  
5 ALERT type 2 Indicator that the structure model may be wrong or deficient  
3 ALERT type 3 Indicator that the structure quality may be low  
1 ALERT type 4 Improvement, methodology, query or suggestion  
4 ALERT type 5 Informative message, check

---

---



It is advisable to attempt to resolve as many as possible of the alerts in all categories. Often the minor alerts point to easily fixed oversights, errors and omissions in your CIF or refinement strategy, so attention to these fine details can be worthwhile. In order to resolve some of the more serious problems it may be necessary to carry out additional measurements or structure refinements. However, the purpose of your study may justify the reported deviations and the more serious of these should normally be commented upon in the discussion or experimental section of a paper or in the "special\_details" fields of the CIF. checkCIF was carefully designed to identify outliers and unusual parameters, but every test has its limitations and alerts that are not important in a particular case may appear. Conversely, the absence of alerts does not guarantee there are no aspects of the results needing attention. It is up to the individual to critically assess their own results and, if necessary, seek expert advice.

### **Publication of your CIF in IUCr journals**

A basic structural check has been run on your CIF. These basic checks will be run on all CIFs submitted for publication in IUCr journals (*Acta Crystallographica*, *Journal of Applied Crystallography*, *Journal of Synchrotron Radiation*); however, if you intend to submit to *Acta Crystallographica Section C* or *E* or *IUCrData*, you should make sure that full publication checks are run on the final version of your CIF prior to submission.

### **Publication of your CIF in other journals**

Please refer to the *Notes for Authors* of the relevant journal for any special instructions relating to CIF submission.



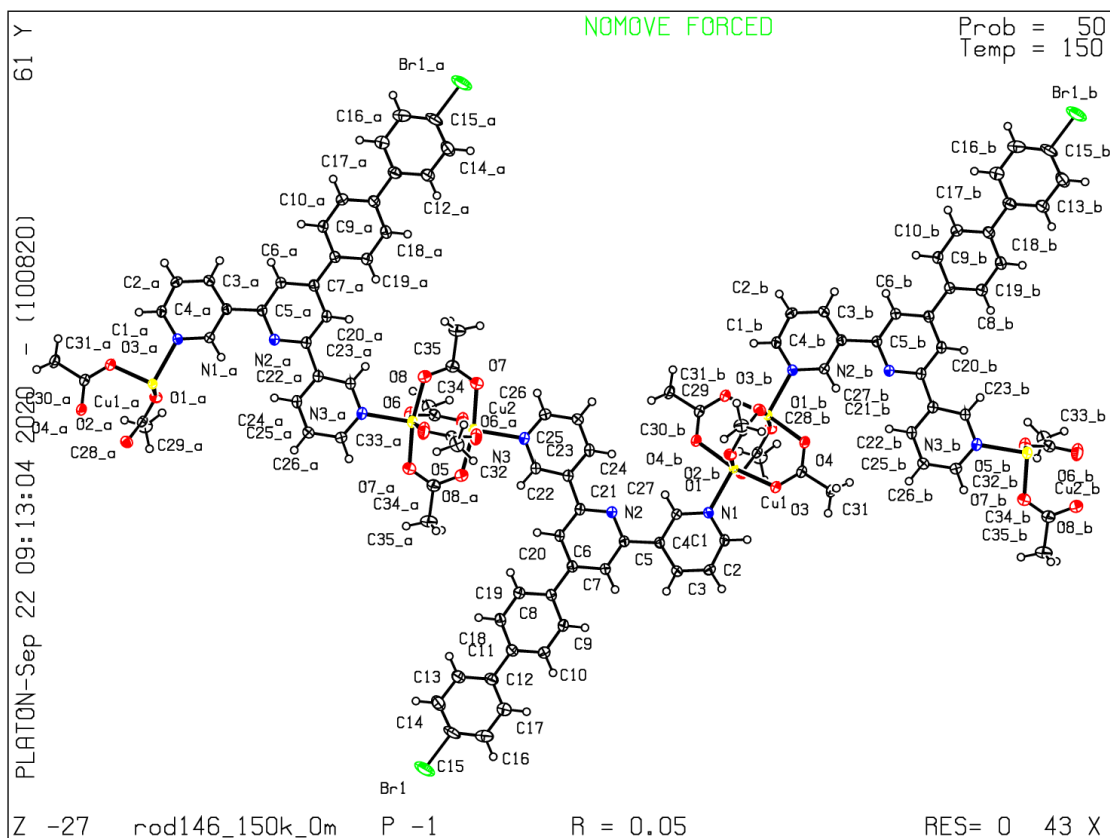

Supplement: s1 [file s1]
