# Supplementary material
Source: MDPI journal article supplement (https://www.mdpi.com/2624-8549/3/1/15)

# checkCIF/PLATON report

Structure factors have been supplied for datablock(s) rod147\_150k\_0m

THIS REPORT IS FOR GUIDANCE ONLY. IF USED AS PART OF A REVIEW PROCEDURE FOR PUBLICATION, IT SHOULD NOT REPLACE THE EXPERTISE OF AN EXPERIENCED CRYSTALLOGRAPHIC REFEREE.

No syntax errors found.      CIF dictionary      Interpreting this report

## Datablock: rod147\_150k\_0m

---

Bond precision:    C-C = 0.0035 A

Wavelength=1.54178

Cell:                    a=8.0240(4)                    b=9.4295(5)                    c=23.8856(11)  
                          alpha=100.767(1)        beta=95.673(2)        gamma=97.244(2)  
Temperature:    150 K

|                | Calculated                | Reported                      |
|----------------|---------------------------|-------------------------------|
| Volume         | 1747.30(15)               | 1747.30(15)                   |
| Space group    | P -1                      | P -1                          |
| Hall group     | -P 1                      | -P 1                          |
| Moiety formula | C36 H33 Cu2 N3 O8, C H4 O | C72 H66 Cu4 N6 O16, 2(C H4 O) |
| Sum formula    | C37 H37 Cu2 N3 O9         | C74 H74 Cu4 N6 O18            |
| Mr             | 794.80                    | 1589.55                       |
| Dx,g cm-3      | 1.511                     | 1.511                         |
| Z              | 2                         | 1                             |
| Mu (mm-1)      | 2.008                     | 2.008                         |
| F000           | 820.0                     | 820.0                         |
| F000'          | 814.40                    |                               |
| h,k,lmax       | 9,11,29                   | 9,11,29                       |
| Nref           | 6662                      | 6397                          |
| Tmin,Tmax      | 0.575,0.755               | 0.585,0.753                   |
| Tmin'          | 0.521                     |                               |

Correction method= # Reported T Limits: Tmin=0.585 Tmax=0.753

AbsCorr = MULTI-SCAN

Data completeness= 0.960

Theta(max)= 70.205

R(reflections)= 0.0366( 6197)

wR2(reflections)= 0.1038( 6397)

S = 1.053

Npar= 477

---

The following ALERTS were generated. Each ALERT has the format

**test-name\_ALERT\_alert-type\_alert-level.**

Click on the hyperlinks for more details of the test.

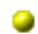

### Alert level C

|                   |                                   |                        |          |                   |       |       |        |
|-------------------|-----------------------------------|------------------------|----------|-------------------|-------|-------|--------|
| PLAT220_ALERT_2_C | NonSolvent                        | Resd 1                 | C        | Ueq(max)/Ueq(min) | Range | 3.1   | Ratio  |
| PLAT911_ALERT_3_C | Missing FCF Refl                  | Between Thmin & STh/L= | 0.600    |                   |       | 87    | Report |
| PLAT976_ALERT_2_C | Check Calcd Resid. Dens.          | 0.49A                  | From O9  |                   |       | -0.61 | eA-3   |
| PLAT976_ALERT_2_C | Check Calcd Resid. Dens.          | 0.43A                  | From O10 |                   |       | -0.57 | eA-3   |
| PLAT977_ALERT_2_C | Check Negative Difference Density | on H37F                |          |                   |       | -0.36 | eA-3   |

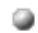

### Alert level G

|                   |                                                  |                  |        |  |  |        |        |
|-------------------|--------------------------------------------------|------------------|--------|--|--|--------|--------|
| PLAT002_ALERT_2_G | Number of Distance or Angle Restraints on AtSite |                  |        |  |  | 3      | Note   |
| PLAT004_ALERT_5_G | Polymeric Structure Found with Maximum Dimension |                  |        |  |  | 1      | Info   |
| PLAT007_ALERT_5_G | Number of Unrefined Donor-H Atoms .....          |                  |        |  |  | 2      | Report |
| PLAT042_ALERT_1_G | Calc. and Reported MoietyFormula Strings Differ  |                  |        |  |  | Please | Check  |
| PLAT045_ALERT_1_G | Calculated and Reported Z Differ by a Factor ... |                  |        |  |  | 2.00   | Check  |
| PLAT172_ALERT_4_G | The CIF-Embedded .res File Contains DFIX Records |                  |        |  |  | 1      | Report |
| PLAT176_ALERT_4_G | The CIF-Embedded .res File Contains SADI Records |                  |        |  |  | 1      | Report |
| PLAT300_ALERT_4_G | Atom Site Occupancy of O9                        | Constrained at   |        |  |  | 0.75   | Check  |
| PLAT300_ALERT_4_G | Atom Site Occupancy of O10                       | Constrained at   |        |  |  | 0.25   | Check  |
| PLAT300_ALERT_4_G | Atom Site Occupancy of H9A                       | Constrained at   |        |  |  | 0.75   | Check  |
| PLAT300_ALERT_4_G | Atom Site Occupancy of H37A                      | Constrained at   |        |  |  | 0.75   | Check  |
| PLAT300_ALERT_4_G | Atom Site Occupancy of H37B                      | Constrained at   |        |  |  | 0.75   | Check  |
| PLAT300_ALERT_4_G | Atom Site Occupancy of H37C                      | Constrained at   |        |  |  | 0.75   | Check  |
| PLAT300_ALERT_4_G | Atom Site Occupancy of H10A                      | Constrained at   |        |  |  | 0.25   | Check  |
| PLAT300_ALERT_4_G | Atom Site Occupancy of H37D                      | Constrained at   |        |  |  | 0.25   | Check  |
| PLAT300_ALERT_4_G | Atom Site Occupancy of H37E                      | Constrained at   |        |  |  | 0.25   | Check  |
| PLAT300_ALERT_4_G | Atom Site Occupancy of H37F                      | Constrained at   |        |  |  | 0.25   | Check  |
| PLAT302_ALERT_4_G | Anion/Solvent/Minor-Residue Disorder (Resd 2 )   |                  |        |  |  | 50%    | Note   |
| PLAT413_ALERT_2_G | Short Inter XH3 .. XHn                           | H18A             | ..H37F |  |  | 2.14   | Ang.   |
|                   |                                                  | -x,-y,2-z =      |        |  |  | 2_557  | Check  |
| PLAT794_ALERT_5_G | Tentative Bond Valency for Cu2                   | (II)             |        |  |  | 2.11   | Info   |
| PLAT860_ALERT_3_G | Number of Least-Squares Restraints .....         |                  |        |  |  | 2      | Note   |
| PLAT910_ALERT_3_G | Missing # of FCF Reflection(s) Below Theta(Min). |                  |        |  |  | 1      | Note   |
| PLAT912_ALERT_4_G | Missing # of FCF Reflections Above STh/L=        | 0.600            |        |  |  | 177    | Note   |
| PLAT913_ALERT_3_G | Missing # of Very Strong Reflections in FCF .... |                  |        |  |  | 1      | Note   |
| PLAT933_ALERT_2_G | Number of OMIT Records in Embedded .res File ... |                  |        |  |  | 1      | Note   |
| PLAT941_ALERT_3_G | Average HKL Measurement Multiplicity .....       |                  |        |  |  | 3.4    | Low    |
| PLAT978_ALERT_2_G | Number C-C Bonds with Positive Residual Density. |                  |        |  |  | 12     | Info   |
| PLAT992_ALERT_5_G | Repd & Actual _reflns_number_gt                  | Values Differ by |        |  |  | 6      | Check  |

- 0 **ALERT level A** = Most likely a serious problem - resolve or explain
- 0 **ALERT level B** = A potentially serious problem, consider carefully
- 5 **ALERT level C** = Check. Ensure it is not caused by an omission or oversight
- 28 **ALERT level G** = General information/check it is not something unexpected

- 2 ALERT type 1 CIF construction/syntax error, inconsistent or missing data
- 8 ALERT type 2 Indicator that the structure model may be wrong or deficient
- 5 ALERT type 3 Indicator that the structure quality may be low
- 14 ALERT type 4 Improvement, methodology, query or suggestion
- 4 ALERT type 5 Informative message, check

It is advisable to attempt to resolve as many as possible of the alerts in all categories. Often the minor alerts point to easily fixed oversights, errors and omissions in your CIF or refinement strategy, so attention to these fine details can be worthwhile. In order to resolve some of the more serious problems it may be necessary to carry out additional measurements or structure refinements. However, the purpose of your study may justify the reported deviations and the more serious of these should normally be commented upon in the discussion or experimental section of a paper or in the "special\_details" fields of the CIF. checkCIF was carefully designed to identify outliers and unusual parameters, but every test has its limitations and alerts that are not important in a particular case may appear. Conversely, the absence of alerts does not guarantee there are no aspects of the results needing attention. It is up to the individual to critically assess their own results and, if necessary, seek expert advice.

### **Publication of your CIF in IUCr journals**

A basic structural check has been run on your CIF. These basic checks will be run on all CIFs submitted for publication in IUCr journals (*Acta Crystallographica*, *Journal of Applied Crystallography*, *Journal of Synchrotron Radiation*); however, if you intend to submit to *Acta Crystallographica Section C* or *E* or *IUCrData*, you should make sure that full publication checks are run on the final version of your CIF prior to submission.

### **Publication of your CIF in other journals**

Please refer to the *Notes for Authors* of the relevant journal for any special instructions relating to CIF submission.

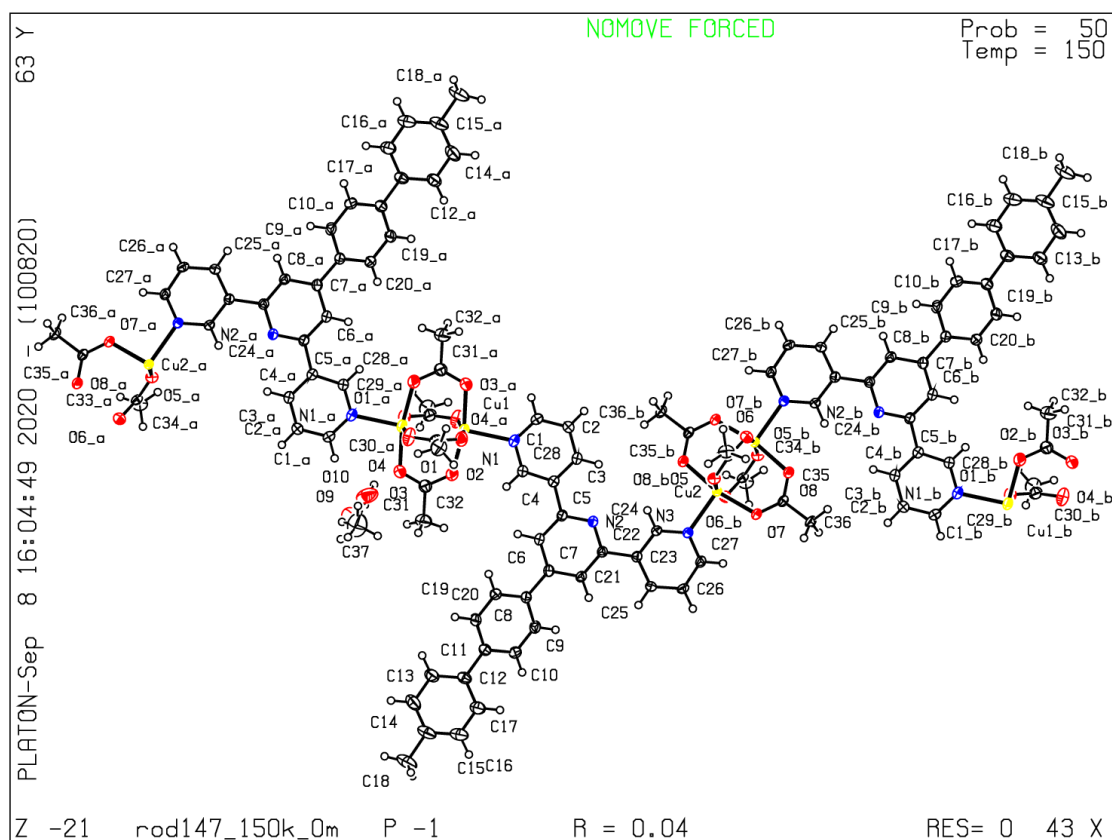

Supplement: s1 [file s1]
